# Supplementary material
Source: Springer Nature journal article supplement (https://www.springermedizin.de/resource/supplementary/12875_2013_1112_MOESM3_ESM.pdf/9435838)
Supplement: MOESM3 [file 9435838]

**Intervention Practice (9 GPs)****Invited to participate**

73 patients

51 female, 22 male

37 less than 50 year, 36 greater than 50 year

**Consented**

58 patients

40 female, 18 male

30 less than 50 year, 28 greater than 50 year

**Enrolled**

50 patients

32 female, 18 male

27 less than 50 year, 23 greater than 50 year

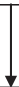**1 month follow up**

43 patients

30 female, 13 male

23 less than 50 year, 20 greater than 50 year

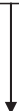**13 month follow up**

36 patients

24 female, 12 male

16 less than 50 year, 20 greater than 50 year

**Control Practice (8 GPs)****Invited to participate**

61 patients

35 female, 26 male

37 less than 50 year, 24 greater than 50 year

**Consented**

50 patients

27 female, 23 male

32 less than 50 year, 18 greater than 50 years old

**Enrolled**

50 patients

27 female, 23 male

32 less than 50 year, 18 greater than 50 year

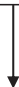**1 month follow up**

45 patients

25 female, 20 male

27 less than 50 year, 18 greater than 50 year

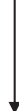**13 month follow up**

34 patients

20 female, 14 male

18 less than 50 year, 16 greater than 50 year
